# 1 The novel P<sub>II</sub>-interacting protein PirA regulates flux into 2 the cyanobacterial ornithine-ammonia cycle

---

3  
4 Paul Bolay<sup>a,\*</sup>, M. Isabel Muro-Pastor<sup>b,\*</sup>, Rokhsareh Rozbeh<sup>c,\*</sup>, Stefan Timm<sup>d</sup>, Martin  
5 Hagemann<sup>d</sup>, Francisco J. Florencio<sup>b</sup>, Karl Forchhammer<sup>c</sup> and Stephan Klähn<sup>a,#</sup>

6  
7 <sup>a</sup>*Helmholtz Centre for Environmental Research, Department of Solar Materials, Permoserstr. 15, D-*  
8 *04318 Leipzig, Germany*

9 <sup>b</sup>*Instituto de Bioquímica Vegetal y Fotosíntesis, CSIC-Universidad de Sevilla, Américo Vespucio 49, E-*  
10 *41092 Sevilla, Spain*

11 <sup>c</sup>*Interfaculty Institute for Microbiology and Infection Medicine, Organismic Interactions Department,*  
12 *Tübingen University, Auf der Morgenstelle 28, 72076, Tübingen, Germany.*

13 <sup>d</sup>*Department of Plant Physiology, University of Rostock, Albert-Einstein-Str. 3, D-18059, Rostock,*  
14 *Germany.*

15  
16 \*These authors contributed equally.

17 #Address correspondence to [stephan.klaehn@ufz.de](mailto:stephan.klaehn@ufz.de)

18  
19  
20 Running Head: Regulation of cyanobacterial arginine synthesis

21 Key words: nitrogen metabolism, cyanobacteria, small inhibitory proteins, P<sub>II</sub> protein

22

23 **Abstract** (250 words)

24 Among prokaryotes, cyanobacteria have an exclusive position due to the fact that they  
25 perform oxygenic photosynthesis. Cyanobacteria substantially differ from other  
26 bacteria in further aspects, e.g. they evolved a plethora of unique regulatory  
27 mechanisms to control primary metabolism. This is exemplified by the regulation of  
28 glutamine synthetase (GS) via small proteins termed inactivating factors (IFs). Here  
29 we reveal another small, 51 amino acid protein, which is encoded by the *ssr0692* gene,  
30 to regulate flux into the ornithine-ammonia cycle (OAC), the key hub of cyanobacterial  
31 nitrogen stockpiling and remobilization. This regulation is achieved by the interaction  
32 with the central carbon/nitrogen control protein P<sub>II</sub>, which commonly controls the entry  
33 into the OAC by activating the key enzyme of arginine synthesis, N-acetyl-L-glutamate  
34 kinase (NAGK). We suggest that Ssr0692 competes with NAGK for P<sub>II</sub> binding and  
35 thereby prevents NAGK activation, which in turn lowers arginine synthesis.  
36 Accordingly, we termed it **P<sub>II</sub>-interacting regulator of arginine synthesis (PirA)**. Similar  
37 to the GS IFs, PirA accumulates in response to ammonium upshift due to relief from  
38 repression by the global nitrogen-control transcription factor NtcA. Consistently,  
39 deletion of PirA affects the cell to balance metabolite pools of the OAC in response to  
40 ammonium shocks. Moreover, its interaction with P<sub>II</sub> requires ADP and is prevented by  
41 P<sub>II</sub> mutations affecting the T-loop conformation, the major protein-interaction surface  
42 of this signal processing protein. Thus, we propose that PirA is an integrator  
43 determining flux into N storage compounds not only depending on the N availability but  
44 also the energy state of the cell.

45 **Importance** (150 words)

46 Cyanobacteria contribute a significant portion to the annual oxygen yield and play  
47 important roles in biogeochemical cycles, e.g. as major primary producers. Due to their  
48 photosynthetic lifestyle cyanobacteria also arouse interest as hosts for the sustainable  
49 production of fuel components and high-value chemicals. However, their broad  
50 application as microbial cell factories is hampered by limited knowledge about the  
51 regulation of metabolic fluxes in these organisms. Our research identified a novel  
52 regulatory protein that controls nitrogen flux, in particular arginine synthesis in the  
53 cyanobacterial model strain *Synechocystis* sp. PCC 6803. Beside its role as  
54 proteinogenic amino acid, arginine is a precursor for the cyanobacterial storage  
55 compound cyanophycin, which is of potential interest to biotechnology. The obtained  
56 results will therefore not only enhance our understanding of flux control in these  
57 organisms, it will also help to provide a scientific fundament for targeted metabolic  
58 engineering and hence the design of photosynthesis-driven biotechnological  
59 applications.

60

61 **Introduction**

62 Nitrogen (N) is one of the key elements of life and needs to be incorporated into  
63 biomolecules via assimilatory pathways. Despite an ever-present resource, only a few  
64 bacteria can fix dinitrogen (N<sub>2</sub>) and the majority of bacteria relies on the uptake and  
65 assimilation of combined N sources from their environment (1–3). To respond to  
66 fluctuations in the availability of those N sources, bacteria possess complex regulatory  
67 networks to control N uptake as well as the activity of assimilatory enzymes (for reviews  
68 see (4–7)). As a prime example, glutamine synthetase (GS), a key enzyme of bacterial

69 ammonium assimilation is tightly regulated in a variety of ways. In *E. coli* and other  
70 proteobacteria expression of the GS encoding *glnA* gene is controlled at the  
71 transcriptional level by the widespread NtrC/NtrB two-component system (5).  
72 Moreover, GS is controlled at the activity level via cumulative feedback inhibition from  
73 numerous metabolites related to N and energy metabolism as well as by covalent  
74 modification, i.e. adenylation of the GS subunits. This modification system is  
75 operated by a bicyclic modification cascade involving the ubiquitous P<sub>II</sub> signal  
76 transducer protein as regulatory element (reviewed in 8). However, striking differences  
77 in comparison to widely accepted paradigms of N assimilation have been revealed in  
78 other bacteria, e.g. cyanobacteria.

79 Cyanobacteria are the only prokaryotes performing oxygenic photosynthesis and play  
80 a major role in global biogeochemical cycles (9–11). Nowadays, they receive growing  
81 interest as biocatalysts in photo-biotechnological applications, e.g. for the sustainable  
82 production of value chemicals and fuels (12–16). To rationally engineer cyanobacteria,  
83 i.e. channeling metabolic fluxes to obtain the maximum yield of a desired chemical  
84 product, it is of paramount importance to fully comprehend underlying regulatory  
85 processes targeting primary metabolism. Albeit our overall understanding of  
86 cyanobacterial systems is still fragmentary compared to other well established  
87 bacterial models, a few systems have been extensively investigated and include  
88 distinctive features. For instance, GS activity is controlled via the interaction with small,  
89 inhibitory proteins unique to cyanobacteria (17, 18). These GS inactivating factors (IFs)  
90 exclusively control GS activity linearly with their abundance. Moreover, with the global  
91 nitrogen control protein NtcA, cyanobacteria use another type of transcription factor to  
92 control the expression of genes in response to N fluctuation (19). NtcA belongs to the  
93 CRP transcriptional regulator family and commonly works as activator of N assimilatory

94 genes (20–23). During N-limitation, increasing levels of 2-oxoglutarate and the co-  
95 activator protein PipX stimulate DNA binding of NtcA (24–26). The interaction between  
96 NtcA and PipX is antagonized by the P<sub>II</sub> protein, which acts as a global multitasking  
97 sensor and regulator, adjusting the carbon-nitrogen homeostasis through versatile  
98 protein-protein interactions (27, 28). This, for instance, includes the key enzyme for  
99 arginine synthesis, N-acetyl glutamate kinase (NAGK), which is activated by complex  
100 formation with P<sub>II</sub> (29).

101 In addition to the activation of N assimilatory genes, NtcA can also act as a repressor  
102 of genes under N limitation. The physiological consequences of simultaneous positive  
103 and negative transcriptional regulation are again exemplified by the well-investigated  
104 GS regulatory system. During N-limiting conditions, NtcA activates transcription of the  
105 *glnA* gene thereby increasing GS abundance and the rate of ammonium assimilation.  
106 Simultaneously, enhanced DNA binding of NtcA represses transcription of the genes  
107 *gifA* and *gifB* encoding the two known IFs, IF7 and IF17 (30). Thereby, GS activity is  
108 tuned in a tradeoff between cellular N demands and relief from the metabolic burden  
109 imposed by the glutamate and ATP-consuming GS catalyzed reaction (for a review  
110 see 30). Besides *gifA* and *gifB*, only a few other genes appear to be negatively  
111 regulated by NtcA. In an attempt to define the entire regulon of NtcA in the unicellular  
112 model strain *Synechocystis* sp. PCC 6803 (hereafter *Synechocystis*), Giner-Lamia et  
113 al. identified the gene *ssr0692* as another NtcA-repressed candidate (20). It encodes  
114 a small protein consisting of 51 amino acids with a high portion of N-rich, positively  
115 charged residues, which were shown to be indispensable for protein-protein interaction  
116 in case of the GS IFs (18). These distinguishing traits point towards a vital function  
117 related to N control similar to the known GS IFs, e.g. as a regulator of a metabolic  
118 pathway.

119 Here we report on the functional analysis of the small protein Ssr0692 in  
120 *Synechocystis*. It accumulates in response to ammonium supply and fulfills crucial  
121 regulatory roles in cyanobacterial metabolism via the interaction with the P<sub>II</sub> signaling  
122 protein. We suggest that it interferes with the P<sub>II</sub>-dependent activation of NAGK.  
123 Consistently, under fluctuating N regimes *ssr0692* mutant strains are impaired in  
124 balancing synthesis of arginine and other amino acids associated with the  
125 cyanobacterial ornithine ammonia cycle identified recently (32). We therefore named  
126 Ssr0692 as **P<sub>II</sub>-interacting regulator of arginine synthesis (PirA)**.

## 127 **Results**

128 Homologs of the *pirA* gene of *Synechocystis* are frequently present in cyanobacterial  
129 genomes and show a high degree of sequence conservation at the amino acid level  
130 (**Fig. 1A,B**). With only a few exceptions sequences similar to PirA are absent from  
131 genomes of other bacterial phyla (as of July 2020 exceptions are: *Candidatus*  
132 *Gracilibacteria bacterium*, *Chloroflexaceae bacterium*, *Flavobacterium sp. CLA17*,  
133 *Methylacidiphilales bacterium*). At first glance, this observation suggests a function  
134 associated with oxygenic photosynthesis. However, *pirA* has previously been identified  
135 as part of the NtcA regulon in *Synechocystis* (20) consistent with two putative NtcA  
136 binding motifs located upstream of the transcriptional start site (TSS) (**Fig. 1C**). In  
137 promoters that are activated by NtcA, the respective binding motifs are centered close  
138 to position -41.5 with regard to the TSS bringing NtcA into a favorable position to  
139 promote the binding of RNA polymerase (33). However, the distal motif upstream of  
140 *pirA* centers at -48.5, which contradicts the typical position in NtcA-activated  
141 promoters. Moreover, the proximal motif centers at -33.5 bp upstream of the TSS, i.e.  
142 the first nucleotide is located at position -40 (**Fig. 1C**). This resembles the situation  
143 upstream of the *gifA/B* genes, which are also negatively regulated by NtcA (20). Both

144 genes harbor binding motifs that are situated in close proximity or even directly  
145 adjacent to the TSS (30), thereby blocking the access of RNA-polymerase.  
146 Accordingly, the motif location upstream of *pirA* indicates a negative regulation by  
147 NtcA. This assumption is consistent with its downregulation under N limitation, similar  
148 to the *gifA/B* genes and in contrast to NtcA-activated genes such as *glnA* or *nrtA*  
149 encoding GS and a nitrate transporter component, respectively (**Fig 1D**).

### 150 **PirA accumulates under N excess and is linked to a function in cyanobacterial N** 151 **metabolism**

152 Genes that are repressed by NtcA, such as the *gifA/B* genes, show low or even non-  
153 detectable transcription under N limitation but are highly expressed in response to  
154 excess N supply. To test whether this is also true for *pirA*, we pre-cultivated  
155 *Synechocystis* cells in presence of nitrate and analyzed transcript levels after induction  
156 of N excess by adding 10 mM ammonium. As expected, the *pirA* mRNA strongly  
157 accumulated under these conditions (**Fig. 1E**). To investigate whether this regulatory  
158 pattern is conveyed to the protein level, we obtained an antibody specific to the PirA  
159 protein. Consistent with the observed transcriptional regulation, the PirA protein also  
160 accumulated in response to ammonium upshifts (**Fig. 1F**). Moreover, the protein  
161 appeared to have a high turnover due to the fact that it eluded detection shortly after  
162 N was depleted. These observations clearly link PirA and its function to cyanobacterial  
163 N metabolism.

164 To investigate the biological function of PirA, knockout and overexpression strains for  
165 the *pirA* gene were established in *Synechocystis*. The knockout mutant  $\Delta 0692$  was  
166 generated by replacing the entire *pirA* open reading frame with a kanamycin resistance  
167 cassette via homologous recombination. In case of the overexpression strain 0692<sup>+</sup>, a  
168 pVZ322 plasmid derivative harboring a transcriptional fusion of *pirA* with the Cu<sup>2+</sup>-

169 inducible *petE* promoter was transferred into *Synechocystis* WT (for a schematic  
170 overview of the constructs see **Fig. 2A**). Full segregation of the mutant allele in  $\Delta 0692$   
171 as well as the presence of the recombinant plasmid in 0692<sup>+</sup> were verified by PCR  
172 (**Fig. 2B**). Subsequent Northern-blot with RNA isolated from cells grown in presence  
173 of 1  $\mu$ M CuSO<sub>4</sub> confirmed the generated mutants: the overexpression strain showed  
174 increased *pirA* mRNA levels compared to WT while in the knockout strain the *pirA*  
175 transcript was absent (**Fig. 2C**). Interestingly, even though the mRNA was present and  
176 its abundance significantly increased in strain 0692<sup>+</sup> due to the ectopic expression  
177 triggered by Cu<sup>2+</sup>, the PirA protein could not be detected in nitrate-grown cells.  
178 However, after adding ammonium, which triggers expression of the native *pirA* gene  
179 from the chromosome, increased PirA levels were detectable in strain 0692<sup>+</sup> compared  
180 to the WT (**Fig. 2D**). This, in addition to the confirmed increase at the mRNA level,  
181 clearly confirmed that the overexpression construct is operative. Obviously, PirA  
182 abundance is not exclusively controlled at the transcriptional level. This observation  
183 was further supported by experiments using a *pirA* knockout mutant in which a *PpetE*-  
184 fused gene copy was introduced. As observed before, the PirA protein could not be  
185 detected after adding Cu<sup>2+</sup> to nitrate-grown cells (**Fig. 2E**). Remarkably, its presence  
186 was still N-dependent similar to WT, i.e. it was detectable only after adding ammonium  
187 (**Fig. 2E**) even though *pirA* transcription was controlled by *PpetE* and hence,  
188 exclusively triggered by Cu<sup>2+</sup>. Consequently, these data indicate an additional,  
189 posttranscriptional control mechanism, which obviously prevents stable PirA  
190 accumulation unless N availability suddenly increases. This again resembles the GS  
191 IFs encoded by the *gifA/B* genes, which are tightly regulated at the transcriptional as  
192 well as posttranscriptional level (34–36).



### 193 **PirA plays a critical role upon changes in the C/N balance**

194 Under standard conditions, i.e. with nitrate as sole N source and under ambient CO<sub>2</sub>,  
195 at which PirA is not detectable in WT, the *pirA*-manipulated recombinant strains grew  
196 similarly to WT as expected (**Fig. 3A,C**). Given the fact that PirA rapidly accumulated  
197 in response to an increasing N availability, which suggests a function related to these  
198 conditions, it was tempting to speculate whether both recombinant strains show a  
199 phenotype, e.g. an affected pigment synthesis/degradation when the N concentration  
200 is altered. In order to test this, we cultivated the WT,  $\Delta$ 0692 and 0692<sup>+</sup> under N  
201 oscillating conditions. For that, we inoculated cultures in nitrate-free BG11 and  
202 cultivated for three days, which was accompanied by pigment degradation (**Fig. 3B,C**),  
203 causing nitrogen-starvation induced chlorosis (37). Cultures of both recombinant  
204 strains showed the same behavior as the WT and did not show a non-bleaching  
205 phenotype as for instance known for *nbl* mutants that are affected in phycobilisome  
206 degradation (38). Consistently, the phycocyanin content was strongly reduced in all  
207 cells, measured by the diminished absorption at 630 nm (**Fig 3D**, Day 3). The similar  
208 bleaching kinetics of all strains is consistent with the fact that PirA is not detectable  
209 under N limitation. Afterwards, the fully chlorotic cells were exposed to consecutive  
210 pulses of limited amounts of ammonium (1 mM) to simulate conditions at which PirA is  
211 rapidly accumulating and likely important. The re-greening process was monitored by  
212 measuring growth as well as whole cell absorption spectra at wavelengths in the range  
213 between 400 and 750 nm. While growth recovery was rather similar in all three strains,  
214 a clearly altered pigmentation was observed in strain 0692<sup>+</sup> after these ammonium  
215 pulses (**Fig. 3C, D**). Consistent with the visible difference, a lower absorption at 630  
216 nm was detected resulting from a reduced phycocyanin content. These data indicate  
217 that the cells are impeded in coping with fluctuating N concentrations and struggle to  
218 recover from chlorosis when PirA accumulation is not correctly balanced. This supports

219 the assumption that this small protein plays a crucial role and might participate in  
220 regulatory processes that control N metabolism.

### 221 **Altered PirA abundance affects metabolites of N metabolism**

222 To further examine a potentially regulatory function of PirA, time-resolved  
223 quantification of selected metabolites was performed for nitrate-grown cells of the WT  
224 and both mutants after addition of 10 mM ammonium. Interestingly, perturbation of  
225 PirA levels had a distinctive impact on the accumulation of several key metabolites in  
226 *Synechocystis*. Most intriguingly, kinetics of metabolites that are part of or are  
227 associated with the recently discovered ornithine-ammonia cycle (32) were strongly  
228 affected in strains  $\Delta 0692$  and  $0692^+$  compared to the WT (**Fig. 4**). In general, N upshift  
229 triggered a transient accumulation of citrulline, ornithine as well as arginine and  
230 aspartate in WT cells similar to previous reports (32). Interestingly, absence of PirA  
231 intensified and prolonged the accumulation of these metabolites while overexpression  
232 of *pirA* prevented or delayed their accumulation to a significant extend (**Fig. 4**).  
233 Moreover, kinetics of glutamine and glutamate, both key amino acids in N metabolism,  
234 showed striking differences between the tested strains. For instance, glutamate, which  
235 represents the main N-donor in a plethora of pathways was significantly decreased in  
236 strain  $0692^+$  throughout the experiment. The data clearly indicate that PirA plays a  
237 pivotal role in balancing fluxes through or into key amino acids such as arginine. In  
238 cyanobacteria, the rate-limiting step of arginine synthesis is controlled by a well-  
239 investigated regulatory mechanism, through complex formation of the key enzyme  
240 NAGK with the P<sub>II</sub> protein (28, 29, 39). Moreover, a PII variant with highly increased  
241 affinity towards NAGK (PII-I86N) causes constitutive NAGK activation and hence  
242 arginine accumulation (40), which was also observed in our study in cells of  $\Delta 0692$ . It  
243 was thus tempting to speculate if PirA might interfere at this regulatory node.

## 244 PirA interacts with the signaling protein P<sub>II</sub> in an ADP-dependent manner

245 Recently, PirA was found enriched in pull down-experiments of the signaling protein  
246 P<sub>II</sub> (41). This indicated that PirA may directly interact with the P<sub>II</sub> protein and thereby  
247 exercise a regulatory function similar to other small P<sub>II</sub> interacting proteins such as  
248 PipX (24) or CfrA/PirC that has recently been discovered by two independent  
249 laboratories (42, 43). To verify the interaction between PirA and P<sub>II</sub> from *Synechocystis*,  
250 *in vitro* binding experiments were performed using Bio-layer interferometry (BLI). To  
251 this end, recombinant protein variants were expressed in and purified from *E. coli*. His<sub>6</sub>-  
252 tagged P<sub>II</sub> protein was immobilized on a Ni-NTA coated sensor tip and a GST-tagged  
253 PirA variant was used as analyte in presence or absence of various effector molecules  
254 (**Fig. 5A**). Indeed, complex formation was detected in presence of ADP in a clear  
255 concentration dependent manner (**Fig. 5B**). In contrast, no interaction was observed  
256 in presence of ATP, mixtures of ATP and 2-OG or when no effector molecule was  
257 present. These data unambiguously revealed ADP-dependent interaction between P<sub>II</sub>  
258 and GST-tagged PirA. To test the specificity of the interaction, we performed similar  
259 measurements using PirA variants, where the GST-tag was removed by proteolytic  
260 cleavage. The small PirA peptide yielded a binding signal that was about six-fold lower  
261 than the signal observed for the GST fusion protein (**Fig. 5C**). This agrees well with  
262 the expected signal, since the BLI-response depends on the mass changes at the  
263 sensor tip (GST-PirA vs. PirA: 31.8 kDa/5.8 kDa = 5.5). Furthermore, providing only  
264 the GST-tag (26 kDa) did not result in any detectable signal (**Fig. 5C**), which clearly  
265 confirms that P<sub>II</sub> specifically interacts with PirA in these binding experiments. Since the  
266 GST-fusion protein is more accurately to handle and the signal is superior to the  
267 isolated PirA peptide, further experiments were performed with GST-tagged PirA.

268 To further study the P<sub>II</sub>-PirA interaction, different P<sub>II</sub> variants were examined. In most  
269 cases, interaction of proteins with P<sub>II</sub> involves the highly flexible T-loop structure that  
270 can adopt a multitude of conformations (27, 44). Accordingly, a P<sub>II</sub> variant lacking the  
271 T-loop (P<sub>II</sub>( $\Delta$ T)-His<sub>8</sub>) was also tested. As expected, no response was observed  
272 confirming interaction with PirA via the T-loop (not shown). Moreover, we tested the  
273 variant P<sub>II</sub>(I86N), where a single amino acid replacement, Ile86 to Asp86, locks the T-  
274 loop in a conformation that promotes constitutive NAGK binding (45, 46). Strikingly,  
275 this variant was not able to bind PirA even in presence of 2 mM ADP that otherwise  
276 promotes binding to the native P<sub>II</sub> (**Fig. 5D**). In contrast, the phosphomimetic variant  
277 P<sub>II</sub>(S49E), which does not interact with NAGK (47), shows unaffected complex  
278 formation with PirA (**Fig. 5D**). Affinity of P<sub>II</sub>(S49E) to PirA was even slightly higher than  
279 observed for the native variant ( $K_D$  values:  $2.9 \pm 0.34 \mu\text{M}$  P<sub>II</sub>(WT);  $2.5 \pm 0.27 \mu\text{M}$  for  
280 P<sub>II</sub>(S49E). Obviously, a conformation of the T-loop that mediates a high P<sub>II</sub> affinity to  
281 NAGK prevents its interaction with PirA. Together with the metabolite profiles showing  
282 dysregulated arginine synthesis in the  $\Delta$ *pirA* mutant, the present data implicate  
283 interference of PirA with NAGK regulation through interaction with P<sub>II</sub>.

## 284 **Discussion**

285 Arginine serves as proteinogenic amino acid and precursor for the synthesis of  
286 polyamines and other N storage compounds such as the cyanobacterial cyanophycin.  
287 In bacteria arginine is synthesized either by a linear pathway, e.g. present in  
288 *Enterobacteriaceae*, or an energetically more favorable cyclic pathway, where N-  
289 acetyl-ornithine reacts with glutamate to yield ornithine and N-acetyl-glutamate, the  
290 starting metabolite of the pathway. The latter pathway is widely distributed in nature  
291 and also present in cyanobacteria (48, 49). Nevertheless, arginine synthesis requires  
292 vast amounts of energy and nitrogen (39) and is thus tightly regulated in bacteria. This

293 is mainly achieved by feedback inhibition of the corresponding key enzymes by the  
294 end product arginine. In *E. coli*, this addresses N-acetylglutamate synthase (NAGS),  
295 which catalyzes the first step of linear arginine synthesis from glutamate (48). By  
296 contrast, in those bacteria harboring the cyclic pathway, the second enzyme NAGK is  
297 feedback inhibited by arginine (49).

## 298 **A novel player in the distinctive regulation of arginine synthesis in** 299 **cyanobacteria**

300 In cyanobacteria NAGK is target of a molecular regulatory mechanism that involves  
301 complex formation with the signal transduction protein P<sub>II</sub> (29, 47). This interaction  
302 diminishes feedback inhibition of NAGK by arginine and, hence, boosts the metabolic  
303 flux towards the end product (29). Its importance for the control of cyanobacterial  
304 metabolism is supported by the fact that this mechanism is widely present in oxygenic  
305 phototrophs such as plants (50, 51) and microalgae (52) but appears to be absent from  
306 other bacteria (for an overview see (53)). Regarding arginine metabolism the  
307 uniqueness of cyanobacteria within the prokaryotes is also exemplified by the recent  
308 discovery of active cycling between ornithine and arginine via an ornithine-ammonia  
309 cycle (OAC), similar to the known ornithine-urea cycle (OUC) that is present in  
310 terrestrial animals but typically absent from bacteria (32).

311 Here we propose the small cyanobacterial protein PirA as a novel key regulator in the  
312 cyanobacterial arginine synthesis pathway and, hence, also the OAC. Our data confirm  
313 PirA accumulation under N excess, in particular when ammonium is added. This  
314 accumulation is obviously required to adjust a certain pool of metabolites that are part  
315 of the OAC, including arginine. Mechanistically, we propose a model where PirA  
316 competes with NAGK for the P<sub>II</sub> protein (**Fig. 6**). In response to ammonium addition,  
317 the high levels of PirA accumulation interfere with complex formation between P<sub>II</sub> and

318 NAGK, thereby mitigating the activation of NAGK and preventing an over-accumulation  
319 of arginine. Surprisingly, detectable PirA accumulation only occurred under ammonium  
320 shock, even when *pirA* mRNA was transcribed independently from N and energy status  
321 of the cell. A similar situation can be encountered with the GS IFs, which were shown  
322 to be degraded by metalloproteases when not bound to GS (34). Thus, it is tempting  
323 to speculate that PirA accumulation can only occur when bound to PII.

### 324 **PirA integrates N- and energy sensing**

325 Remarkably, PirA only forms a complex with P<sub>II</sub> in the presence of ADP. Accordingly,  
326 the pivotal stimulus for the suggested regulatory mechanism is not only the N status,  
327 which is mainly sensed by 2-OG in cyanobacteria similar to other prokaryotes (54, 55).  
328 The 2-OG level determines the affinity of NtcA to its binding motif (21, 26), which  
329 therefore also determines PirA accumulation. Moreover, PirA was found to transiently  
330 but strongly accumulate during low C supply (56). This is consistent with the de-  
331 repression of the *pirA* gene by the dissociation of NtcA from its binding motif upstream  
332 since low C supply, i.e. a low C/N ratio leads to a decreased 2-OG pool (57). The  
333 interaction between PirA and P<sub>II</sub> strongly responds to ADP as another signal and  
334 hence, also depends on the cellular energy status. These observations resemble  
335 another small P<sub>II</sub>-interacting protein, PipX, whose interaction with P<sub>II</sub> is enhanced by  
336 ADP as well (58, 59). PipX functions as co-activator of the transcription factor NtcA  
337 and is required for the 2-OG-dependent DNA binding and transcriptional activation of  
338 genes (24). In presence of high ADP levels, PipX preferably interacts with P<sub>II</sub>, which  
339 attenuates NtcA activity and in turn leads to de-repression and upregulation of the *pirA*  
340 gene, similar to the *gif* genes encoding the GS IFs (30).

341 Interestingly, *in vitro* data showed that the NAGK-P<sub>II</sub> interaction is also ADP-sensitive.  
342 While ADP does not entirely prevent complex formation, it increases dissociation of

343 NAGK from ADP-bound P<sub>II</sub> (45). However, detailed analysis of NAGK-P<sub>II</sub> complex  
344 formation demonstrated that this interaction is mainly tuned by 2-OG and not the  
345 energy status of the cell (58, 60). It should be kept in mind that the sensing properties  
346 of P<sub>II</sub> are influenced by the binding partner in such a way, that for certain targets, small  
347 fluctuation in the ADP/ATP ratios are sensed (e.g. P<sub>II</sub>-PipX complex formation)  
348 whereas in other cases, fluctuation in the 2-OG levels are perceived (e.g. P<sub>II</sub>-NAGK  
349 interaction). In light of these data, PirA appears to amplify the energy-dependent signal  
350 in P<sub>II</sub>-mediated activation of NAGK: by sequestering P<sub>II</sub> under conditions of low 2-OG  
351 and high ADP-levels, PirA may shift the equilibrium of P<sub>II</sub>-NAGK complex towards non-  
352 complexed NAGK when the cell experiences energy limitation due to high GS activity  
353 in consequence of ammonium addition.

354 Depending on the detailed structure of the complexes, P<sub>II</sub> phosphorylation either  
355 abrogates interaction with its targets, as demonstrated for NAGK (29), or has no effect  
356 on them, as in the case of P<sub>II</sub>-PipX interaction (33). The phosphomimetic variant  
357 P<sub>II</sub>(S49E) showed slightly enhanced interaction with PirA as compared to P<sub>II</sub>(WT). In a  
358 similar way, P<sub>II</sub> interacts with PipX irrespective of Ser49 modification, but nevertheless,  
359 the interaction is T-loop dependent (24). The major interaction surface is at the  
360 proximal part of the T-loop, whereas the tip region with the critical Ser49 residue does  
361 not participate in complex formation. From the Ser49-independent mode of PirA-P<sub>II</sub>  
362 interaction it can be concluded that the PirA-P<sub>II</sub> interaction could also take place with  
363 phosphorylated P<sub>II</sub> that does not bind to NAGK. In any case, the interaction of P<sub>II</sub> with  
364 NAGK or PirA appears to be mutually exclusive since both P<sub>II</sub>-interaction partners  
365 require the T-loop in different conformation for interaction. The competition between  
366 NAGK and PirA for P<sub>II</sub> is further illustrated by the inability of PirA to bind P<sub>II</sub>(I86N). This  
367 variant adopts a constitutive NAGK-bound like structure of the T-loop (45, 46).

368 Accordingly, the lack of interaction with P<sub>II</sub>(I86N) also agrees with the strong *in vivo*  
369 activation of NAGK by this variant (40). However, for a more detailed understanding of  
370 the mechanism, by which PirA affects P<sub>II</sub> signaling, functional biochemical studies and  
371 structural analyses are required.

### 372 **Further implications of PirA beyond arginine synthesis**

373 PirA potentially fulfills several other functions since it appears to feature additional  
374 interaction partners, as suggested by previous high-throughput yeast-two hybrid  
375 analyses. Among them are NADH dehydrogenase subunit NdhH, DNA polymerase I  
376 PolA, the ATP-dependent helicase PcrA as well as several unknown and hypothetical  
377 proteins (61). Moreover, *pirA* overexpression was shown to significantly improve  
378 butanol tolerance in *Synechocystis* (62). As solvents like butanol compromise cell  
379 membrane integrity resulting in loss of proton motive force, the cell increasingly  
380 accumulates reactive oxygen species (ROS) through enhanced respiration in an  
381 attempt to catch up on lost ATP (63, 64). Given that PirA appears to protect adenylate  
382 energy pools, an interaction with players involved in processes that consume large  
383 quantities of nucleotides, e.g. DNA replication, appears meaningful. Moreover,  
384 overexpression of PirA might result in reduced ROS production as the cell retains  
385 sufficient amounts of ATP.

386 The occurrence of PirA homologs in other cyanobacterial strains does not coincide with  
387 a certain lifestyle or phylogeny. For instance, the *pirA*-homolog *asr1328* of the  
388 filamentous, diazotrophic cyanobacterium *Anabaena* sp. PCC 7120 was shown to be  
389 negatively regulated by NtcA as well (65). Similar to the GS IFs, gene annotations in a  
390 few strains such as *Thermosynechococcus elongatus* or *Synechococcus* sp. JA-3-3Ab  
391 suggest that alternative versions of PirA with an extended N-terminus might also exist  
392 **(Supplementary Fig. S1)**. Nevertheless, the existence of those proteins has not been



393 experimentally shown yet, and hence, false annotations cannot be excluded. This  
394 assumption is supported by the fact that on the one hand only a few of those elongated  
395 sequences could be found in protein databases, which on the other hand only show  
396 partial similarity. Therefore, the function of these N-terminal extensions remains  
397 elusive to date. In addition, it is worth noting that PirA is, similar to the GS IFs,  
398 completely absent in marine picocyanobacteria (**Fig. 1**). In accordance, these clades  
399 lack several salient features of N-sensing and utilization which are widespread among  
400 cyanobacteria. For instance, P<sub>II</sub> is not subject to phosphorylation in *Prochlorococcus*  
401 (66, 67), and both *Prochlorococcus* and *Synechococcus* genera are incapable of  
402 cyanophycin synthesis and lack several OAC cycle genes (68). These genome-  
403 streamlined strains occur in oligotrophic realms of the ocean with hardly any fluctuation  
404 in nutrient supply (69). Thus, it is compelling to speculate that PirA-mediated short-  
405 term adjustment of arginine synthesis to the N and energy status of the cell is not  
406 required in such habitats.

407

## 408 **Material & Methods**

### 409 **Strains and growth conditions**

410 A *Synechocystis* sp. PCC 6803 strain originally obtained from N. Murata (Japan) was  
411 used as wild type. Cells were grown in BG11 medium (70) depleted in Cu<sup>2+</sup> ions and  
412 supplemented with 10 mM TES buffered at pH 8.0. The sole N source in that medium  
413 is nitrate at a concentration of 17.64 mM (stated as nitrate-grown). Cultivation was  
414 performed in baffled Erlenmeyer flasks in presence of ambient CO<sub>2</sub> under constant  
415 illumination (white light, 50μE), at 30°C, 75% humidity and 150 rpm. Each recombinant  
416 strain was isolated on BG11-agar plates and maintained in medium containing either

417 kanamycin or gentamycin at a concentration of 50 µg/ml and 2 µg/ml, respectively.  
418 Prior to the experiments investigating the impact of altered PirA abundance the cultures  
419 were supplemented with 1 µM CuSO<sub>4</sub>.

## 420 **Mutant strain generation**

421 To knockout the *ssr0692* (*pirA*) gene, the upstream and downstream region of *pirA*  
422 were amplified from *Synechocystis* gDNA using primer combinations  
423 Ssr0692upst\_fw/Ssr0692upst\_rev and Ssr0692downst\_fw/Ssr0692downst\_rev,  
424 respectively (all primers are listed in **Supplementary Table S1**). The kanamycin  
425 resistance cassette was amplified from a customized construct obtained by gene  
426 synthesis using primers KmR\_fw and KmR\_rev. The synthesized construct harboured  
427 the *aphII* gene and its promoter which were originally obtained from pUC4K  
428 (Amersham). In addition, an *oop* terminator was introduced downstream of *aphII*. All  
429 amplicons had short fragments of sequence complementarity and were fused via  
430 polymerase cycling assembly (PCA) using primers Ssr0692upst\_fw/  
431 Ssr0692downst\_rev. The resulting construct was introduced into pJET1.2 (Thermo  
432 Scientific) and used to transform chemically competent *E. coli* DH5α. After isolation of  
433 the pJET\_ssr0692\_KmR\_KO plasmid from *E. coli*, the knockout construct was  
434 introduced into *Synechocystis* WT by natural transformation and homologous  
435 recombination into the chromosome. To enable overexpression of *pirA*, the 5' UTR and  
436 3'UTR of the *petE* gene were amplified from *Synechocystis* gDNA using primers  
437 PpetE\_fw(XhoI)/5'petE\_ssr0692\_rev and 3'petE\_ssr0692\_fw/Toop\_rev(Asel). The  
438 *pirA* coding sequence was amplified from *Synechocystis* gDNA using primers  
439 ssr0692\_fw/rev. All amplicons were fused via PCR and introduced into the broad-host  
440 range plasmid pVZ322 via restriction digestion and ligation into XhoI/Asel sites. The  
441 recombinant plasmid pVZ322-PpetE:ssr0692, obtained after transformation of and

442 purification from *E. coli* DH5 $\alpha$ , was introduced into *Synechocystis* WT via  
443 electroporation. All strains and constructs were verified by PCR and Sanger  
444 sequencing.

445 To generate the alternative  $\Delta 0692/P_{petE}$ -*ssr0692* strain (chromosomal integration) a  
446 DNA fragment containing *ssr0692* gene including the sequence coding for six histidine  
447 residues was amplified by PCR using genomic DNA and primers *ssr0692.KpnI* and  
448 *ssr0692.HisBamHI*. This fragment was cloned into *KpnI*-*BamHI* digested pPLAT  
449 plasmid(34), a pGEM-T derivative containing a 2 kb region of the non-essential  
450 *nrsBACD* operon (71). The *petE* promoter was amplified by PCR using genomic DNA  
451 and primers *PpetE.KpnI.1* and *PpetE.KpnI.2* and cloned into *KpnI* site of *ssr0692*-  
452 containing pPLAT. Finally, a Km<sup>r</sup> CK1 cassette from pRL161 (72) was cloned in the  
453 *BamHI* site of pPLAT, generating pPLAT-*PpetE*.*ssr0692*. This plasmid was used to  
454 transform the  $\Delta 0692$  strain. All generated strains and their properties are given in  
455 **Supplementary Table S2.**

#### 456 **N-oscillation experiment**

457 Wild type and mutant strains were inoculated in triplicates at OD<sub>750</sub> = 0.1 in 3-buffed  
458 100 ml flasks in 20 ml N-depleted BG11 supplemented with 1 $\mu$ M CuSO<sub>4</sub>. For  
459 comparison, the same strains were also cultivated in standard BG11 medium  
460 containing 17.64 mM nitrate. After 3 days, the N-starved cells were supplemented  
461 with 1mM NH<sub>4</sub>Cl, a step which was repeated after 5 and 6 days. Whole cell spectra of  
462 cell suspensions were conducted with a Cary 300 UV/Vis Spectrophotometer (Agilent).

#### 463 **RNA extraction and Northern blots**

464 Cells for northern blot analysis were harvested by rapid filtration on polyether sulfone  
465 filters (pore size 0.8  $\mu$ m, PALL). Filters were immediately resolved in 1 ml PGTX  
466 solution (73) and frozen in liquid N<sub>2</sub>. RNA extraction was conducted as previously

467 described (74). For northern blots, 3 µg of RNA were separated on MEN-buffered 1.5%  
468 agarose gels that provided denaturing conditions by 6% formaldehyde using an RNA  
469 sample loading buffer containing a final concentration of 62.5% (v/v) deionized  
470 formamide (Sigma-Aldrich). Afterwards, RNA was transferred via capillary blotting to  
471 an Amersham Hybond N<sup>+</sup> nylon membrane (GE healthcare) and cross-linked with 1250  
472 µJ in a UVP crosslinker (Analytik Jena). To specifically detect the *pirA* transcript, the  
473 RNA-mounted nylon membrane was hybridized with a complementary, α-<sup>32</sup>P-labeled  
474 ssRNA probe that was generated by *in vitro* transcription using the MAXIscript® T7  
475 Transcription Kit (Thermo Fisher Scientific). As transcription template a DNA fragment  
476 obtained by PCR with primers Ssr0692\_T7\_fw and Ssr0692\_rev was used.  
477 Subsequently, Fuji BAS-IIIS imaging plates were exposed to the membranes and read  
478 out by an Amersham Typhoon laser scanner (GE Healthcare). As loading control, the  
479 same membranes were hybridized with ssRNA probes complementary to the 5S rRNA,  
480 which were generated in the same way using primers 5sRNA\_fw/rev (**Supplementary**  
481 **Table S1**).

#### 482 **Anti-PirA antibody production**

483 A DNA fragment encompassing the *pirA* ORF was amplified by PCR from  
484 *Synechocystis* genomic DNA, using the oligonucleotides Ssr0692ORF-fw and  
485 Ssr0692ORF-rv. This fragment was cloned into pET24a(+) plasmid *NdeI-XhoI*  
486 digested (Novagen) to generate pET24-Ssr0692 plasmid. Exponentially growing *E. coli*  
487 BL21 cells transformed with pET24-Ssr0692 were treated with 1 mM of isopropyl β-D-  
488 1-thiogalactopyranoside for 4 h. For purification of PirA-His<sub>6</sub> protein, cells were  
489 collected, resuspended in buffer A (20 mM sodium phosphate, pH 7.5, 150 mM NaCl,  
490 5 mM imidazole) with 1 mM phenylmethylsulfonyl fluoride (PMSF) and disrupted by  
491 sonication. The lysate was centrifuged at 18.000 x *g* for 20 min. PirA-His<sub>6</sub> from the

492 supernatant was purified by Ni-affinity chromatography using HisTrapHP column (GE  
493 Healthcare) and following the manufacturer's instructions. Elution was performed with  
494 a linear gradient (5-500 mM imidazole) in buffer A. Fractions with PirA-His<sub>6</sub> were  
495 pooled, concentrated using Centrifugal Filter Units (Amicon Ultra-15 3 kDa) (Millipore),  
496 and subjected to gel filtration chromatography using a Hiload 16/60 Superdex 75 gel  
497 filtration column (GE Healthcare) running on an AKTA FPLC system. Fractions  
498 containing purified PirA-His<sub>6</sub> protein were pooled, concentrated and quantified in a  
499 NanoDrop 1000 spectrophotometer (Thermo scientific) using the extinction coefficient  
500 of PirA-His<sub>6</sub> calculated with ExPASy-ProtParam tool. Anti-PirA antiserum was obtained  
501 according to standard immunization protocols by injecting 1.5 mg of purified PirA-His<sub>6</sub>  
502 protein in rabbits.

### 503 **Preparation of crude extracts and Western blot analysis**

504 For the analysis of proteins abundance, 2 U OD<sub>750</sub> were harvested and resuspended  
505 in 80 µl of 50 mM HEPES-NaOH buffer (pH 7.0), 50 mM KCl, 1 mM  
506 phenylmethylsulfonyl fluoride (PMSF). Crude extracts were prepared using glass  
507 beads as previously described (75). For western blot analysis, proteins were  
508 fractionated on 15% SDS-PAGE (76) and transferred to nitrocellulose membranes  
509 (Bio-Rad). Blots were blocked with 5% (w/v) non-fat dry milk (AppliChem) in PBS-  
510 Tween 20. Antisera were used at the following dilutions: Anti-PirA (1:5000) and anti-  
511 TrxA (1:10000)(77). The ECL Prime Western Blotting Detection Reagent (GE  
512 Healthcare) was used to detect the different antigens with anti-rabbit secondary  
513 antibodies (1:25000) (Sigma-Aldrich).

### 514 **Metabolite analysis**

515 For metabolite analysis, cells were grown in BG11 containing the standard nitrate  
516 amount until reaching OD<sub>750</sub> ~0.8. Cells were harvested shortly before and after the

517 addition of 10 mM ammonium chloride by centrifugation of 2 ml culture at 17,000 x *g*  
518 for 1 minute. Supernatant was discarded and pellets were snap frozen in liquid N.  
519 Metabolite extraction was performed by resuspending cell pellets in 1 ml of 80% [v/v]  
520 ethanol supplemented with 1 µg/ml L-carnitine hydrochloride as internal standard and  
521 heating for 2 h at 60°C. After centrifugation at 17,000 x *g* for 5 minutes, the supernatant  
522 was transferred to a fresh vial and the pellet was again resuspended in 1 ml of 80%  
523 [v/v] ethanol and heated at 60°C for 2h. After centrifugation at 17,000 x *g* for 5 minutes,  
524 supernatants were combined and dried in a centrifugal evaporator.

525 Next, the dried extracts were dissolved in 1000 µL LC-MS grade water and filtrated  
526 through 0.2 µm filters (Omnifix-F, Braun, Germany). 1 µl of the cleared supernatants  
527 were analyzed using the high-performance liquid chromatograph mass spectrometer  
528 LCMS-8050 system (Shimadzu) and the incorporated LC-MS/MS method package for  
529 primary metabolites (version 2, Shimadzu) as described in (78).

### 530 **Bio-layer interferometry (BLI)**

531 Protein interaction studies via Bio-layer interferometry (BLI) were performed on an  
532 Octet K2 instrument (Fortébio Molecular Devices (UK) Limited, Wokingham, United  
533 Kingdom), which allows simultaneous binding experiments on two channels, one of  
534 which is used as negative control. All experiments were done in buffer containing 50  
535 mM Tris-HCl pH 7.4, 150 mM KCl, 2 mM MgCl<sub>2</sub>, 0.02% LDAO and 0.2mg/ml BSA.  
536 Effector molecules were used at following concentrations: 2 mM ATP, 2 mM 2-OG and  
537 0.1, 0.25, 0.5, 1 and 2 mM for ADP. Interaction experiments were performed as  
538 reported previously (43). Briefly, His<sub>8</sub>-tagged variants of P<sub>II</sub>, namely P<sub>II</sub>(WT), P<sub>II</sub>(S49E),  
539 P<sub>II</sub>(I86N) and P<sub>II</sub>(ΔT)-His<sub>8</sub> were used as ligands bound to Ni-NTA coated sensor tips.  
540 Various concentrations of GST-PirA from 125 to 12000 nM were used as analyte to  
541 display association reactions at 30°C. As preliminary experiments showed GST-PirA

542 binds unspecifically to the Ni-NTA sensor tips, the non-interacting P<sub>II</sub>( $\Delta$ T) variant was  
543 used to saturate the tips and thereby remove unspecific binding. The binding of P<sub>II</sub>  
544 ligands was performed by first loading 10  $\mu$ g/ml of P<sub>II</sub> on the Ni-NTA sensor tip, followed  
545 by dipping the tip into buffer for 60 s (to remove unbound P<sub>II</sub>) and recording the first  
546 baseline. To block unoccupied sites on the sensor surface, that cause disturbing  
547 unspecific binding, 72  $\mu$ g/ml P<sub>II</sub>( $\Delta$ T) was loaded onto the tip. Afterwards, a second  
548 baseline was recorded for 60 s. Association and dissociation of analyte was carried  
549 out by dipping the tip first into GST-PirA solution for 180s and then transferring it into  
550 buffer solution for further 120s. In every single experiment, one sensor loaded with  
551 P<sub>II</sub>( $\Delta$ T) was used as negative control. To investigate the binding of GST tag alone and  
552 PirA without the GST-tag to P<sub>II</sub> protein, parallel experiments were performed in the  
553 presence of 2 mM ADP. The interaction curves were achieved by subtracting the  
554 control curve and adjusting them to the average of baseline and dissociation steps. In  
555 every set of experiment  $K_D$  values were calculated by plotting concentration versus  
556 maximum response.

557 His<sub>8</sub>-tagged variants of P<sub>II</sub> were prepared as previously described (79). For the  
558 preparation of recombinant PirA protein for BLI analysis, the *pirA* gene was cloned into  
559 XhoI and EcoRI sites of pGEX-4T-3 vector (GE Healthcare Life Sciences, Freiburg,  
560 Germany), encoding recombinant PirA with N-terminal-fused GST-tag. In addition, *pirA*  
561 was cloned into Sapl-site of pBXC3GH vector (Addgene, Taddington,U.K.), encoding  
562 PirA with a C-terminally fused GFP-His<sub>10</sub>-tag. The plasmids were overexpressed in *E.*  
563 *coli* strain BL21(DE3). Purification of PirA with GST or GFP-His<sub>10</sub> tags was performed  
564 as previously described (80, 81). To remove the GFP-His<sub>10</sub>-tag from PirA, 2.4 mg of  
565 recombinant PirA in 750  $\mu$ l of PirA-buffer (50mM Tris/HCl, 100mM KCl, 100mM NaCl,  
566 5mM MgCl<sub>2</sub>, 0.5mM EDTA, 1mM DTT, pH 7.8) were treated with 50  $\mu$ l 3C protease

567 (0.1. mg) at 4°C over night. Afterwards, 200 µl Ni-NTA agarose beads (QIAGEN GmbH,  
568 Hilden, Germany) were added to the mixture and gently shaken at room temperature  
569 for 60 min. The beads were removed by filtration and the tag-free PirA protein was  
570 dialyzed against PirA buffer containing 50% (v/v) glycerol and stored at -20° C until  
571 use.

## 572 **Acknowledgments**

573 The project was funded by grants from the German Research Foundation (DFG) to SK  
574 (KL 3114/2-1), KF (Fo195/17-1) and MH (HA 2002/23-1), grants BIO2016-75634-P  
575 and PID2019-104513GB-100 from Agencia Estatal de Investigación (AEI) to FJF and  
576 MIMP, and BIO-0284 Group from Junta de Andalucía, all co-financed by FEDER  
577 (European regional development fund). The LC-MS/MS equipment at University of  
578 Rostock was financed through the HBFEG program (GZ: INST 264/125-1 FUGG to  
579 M.H.). We also acknowledge the use of the facilities of the Centre for Biocatalysis  
580 (MiKat) at the Helmholtz Centre for Environmental Research (UFZ). The UFZ is  
581 supported by the European Regional Development Funds (EFRE, Europe funds  
582 Saxony) and the Helmholtz Association.

## 583 **References**

- 584 1. Herrero A, Flores E, Imperial J. 2019. Nitrogen assimilation in bacteria, p. 280–  
585 300. *In* Schmidt, TM (ed.), *Encyclopedia of Microbiology (Fourth Edition)*.  
586 Academic Press, Oxford.
- 587 2. Smercina DN, Evans SE, Friesen ML, Tiemann LK. 2019. To fix or not to fix:  
588 Controls on free-living nitrogen fixation in the Rhizosphere. *Appl Environ Microbiol*  
589 85.



- 590 3. Zehr JP, Capone DG. 2020. Changing perspectives in marine nitrogen fixation.  
591 Science 368.
- 592 4. Magasanik B. 1982. Genetic control of nitrogen assimilation in bacteria. Annu Rev  
593 Genet 16:135–168.
- 594 6. Reitzer L. 2003. Nitrogen assimilation and global regulation in *Escherichia coli*.  
595 Annu Rev Microbiol 57:155–176.
- 596 7. van Heeswijk WC, Westerhoff HV, Boogerd FC. 2013. Nitrogen assimilation in  
597 *Escherichia coli*: putting molecular data into a systems perspective. Microbiol Mol  
598 Biol Rev MMBR 77:628–695.
- 599 8. Stadtman ER. 2004. Regulation of glutamine synthetase activity. EcoSal Plus 1.
- 600 9. Flombaum P, Gallegos JL, Gordillo RA, Rincón J, Zabala LL, Jiao N, Karl DM, Li  
601 WKW, Lomas MW, Veneziano D, Vera CS, Vrugt JA, Martiny AC. 2013. Present  
602 and future global distributions of the marine cyanobacteria *Prochlorococcus* and  
603 *Synechococcus*. Proc Natl Acad Sci 110:9824–9829.
- 604 10. Montoya JP, Holl CM, Zehr JP, Hansen A, Villareal TA, Capone DG. 2004. High  
605 rates of N<sub>2</sub> fixation by unicellular diazotrophs in the oligotrophic Pacific Ocean.  
606 Nature 430:1027–1032.
- 607 11. Soo RM, Hemp J, Hugenholtz P. 2019. Evolution of photosynthesis and aerobic  
608 respiration in the cyanobacteria. Free Radic Biol Med 140:200–205.
- 609 12. Appel J, Hueren V, Boehm M, Gutekunst K. 2020. Cyanobacterial *in vivo* solar  
610 hydrogen production using a photosystem I–hydrogenase (PsaD-HoxYH) fusion  
611 complex. Nat Energy 5:458–467.

- 612 13. Ducat DC, Way JC, Silver PA. 2011. Engineering cyanobacteria to generate high-  
613 value products. *Trends Biotechnol* 29:95–103.
- 614 14. Hagemann M, Hess WR. 2018. Systems and synthetic biology for the  
615 biotechnological application of cyanobacteria. *Curr Opin Biotechnol* 49:94–99.
- 616 15. Saper G, Kallmann D, Conzuelo F, Zhao F, Tóth TN, Liveanu V, Meir S,  
617 Szymanski J, Aharoni A, Schuhmann W, Rothschild A, Schuster G, Adir N. 2018.  
618 Live cyanobacteria produce photocurrent and hydrogen using both the respiratory  
619 and photosynthetic systems. 1. *Nat Commun* 9:2168.
- 620 16. Wijffels RH, Kruse O, Hellingwerf KJ. 2013. Potential of industrial biotechnology  
621 with cyanobacteria and eukaryotic microalgae. *Curr Opin Biotechnol* 24:405–413.
- 622 17. García-Domínguez M, Reyes JC, Florencio FJ. 1999. Glutamine synthetase  
623 inactivation by protein–protein interaction. *Proc Natl Acad Sci U S A* 96:7161–  
624 7166.
- 625 18. Saelices L, Galmozzi CV, Florencio FJ, Muro-Pastor MI. 2011. Mutational analysis  
626 of the inactivating factors, IF7 and IF17 from *Synechocystis* sp. PCC 6803: critical  
627 role of arginine amino acid residues for glutamine synthetase inactivation. *Mol*  
628 *Microbiol* 82:964–975.
- 629 19. Luque I, Flores E, Herrero A. 1994. Molecular mechanism for the operation of  
630 nitrogen control in cyanobacteria. *EMBO J* 13:2862–2869.
- 631 20. Giner-Lamia J, Robles-Rengel R, Hernández-Prieto MA, Muro-Pastor MI,  
632 Florencio FJ, Futschik ME. 2017. Identification of the direct regulon of NtcA during  
633 early acclimation to nitrogen starvation in the cyanobacterium *Synechocystis* sp.  
634 PCC 6803. *Nucleic Acids Res* 45:11800–11820.

- 635 21. Herrero A, Muro-Pastor AM, Flores E. 2001. Nitrogen control in cyanobacteria. J  
636 Bacteriol 183:411–425.
- 637 22. Herrero A, Muro-Pastor AM, Valladares A, Flores E. 2004. Cellular differentiation  
638 and the NtcA transcription factor in filamentous cyanobacteria. FEMS Microbiol  
639 Rev 28:469–487.
- 640 23. Vega-Palas MA, Flores E, Herrero A. 1992. NtcA, a global nitrogen regulator from  
641 the cyanobacterium *Synechococcus* that belongs to the Crp family of bacterial  
642 regulators. Mol Microbiol 6:1853–1859.
- 643 24. Espinosa J, Forchhammer K, Burillo S, Contreras A. 2006. Interaction network in  
644 cyanobacterial nitrogen regulation: PipX, a protein that interacts in a 2-  
645 oxoglutarate dependent manner with P<sub>II</sub> and NtcA. Mol Microbiol 61:457–469.
- 646 25. Forcada-Nadal A, Llácer JL, Contreras A, Marco-Marín C, Rubio V. 2018. The P<sub>II</sub>-  
647 NAGK-PipX-NtcA regulatory axis of Cyanobacteria: A tale of changing partners,  
648 allosteric effectors and non-covalent interactions. Front Mol Biosci 5.
- 649 26. Vázquez-Bermúdez MF, Herrero A, Flores E. 2002. 2-Oxoglutarate increases the  
650 binding affinity of the NtcA (nitrogen control) transcription factor for the  
651 *Synechococcus glnA* promoter. FEBS Lett 512:71–74.
- 652 27. Forchhammer K, Lüddecke J. 2016. Sensory properties of the P<sub>II</sub> signalling protein  
653 family. FEBS J 283:425–437.
- 654 28. Forchhammer K, Selim KA. 2020. Carbon/nitrogen homeostasis control in  
655 cyanobacteria. FEMS Microbiol Rev 44:33–53.

- 656 29. Heinrich A, Maheswaran M, Ruppert U, Forchhammer K. 2004. The  
657 *Synechococcus elongatus* P<sub>II</sub> signal transduction protein controls arginine  
658 synthesis by complex formation with N-acetyl-L-glutamate kinase. *Mol Microbiol*  
659 52:1303–1314.
- 660 30. García-Domínguez M, Reyes JC, Florencio FJ. 2000. NtcA represses  
661 transcription of *gifA* and *gifB*, genes that encode inhibitors of glutamine synthetase  
662 type I from *Synechocystis* sp. PCC 6803. *Mol Microbiol* 35:1192–1201.
- 663 31. Bolay P, Muro-Pastor MI, Florencio FJ, Klähn S. 2018. The distinctive regulation  
664 of cyanobacterial glutamine synthetase. *Life Basel Switz* 8.
- 665 32. Zhang H, Liu Y, Nie X, Liu L, Hua Q, Zhao G-P, Yang C. 2018. The cyanobacterial  
666 ornithine–ammonia cycle involves an arginine dihydrolase. *Nat Chem Biol* 14:575.
- 667 33. Llácer JL, Espinosa J, Castells MA, Contreras A, Forchhammer K, Rubio V. 2010.  
668 Structural basis for the regulation of NtcA-dependent transcription by proteins  
669 PipX and P<sub>II</sub>. *Proc Natl Acad Sci U S A* 107:15397–15402.
- 670 34. Galmozzi CV, Fernández-Avila MJ, Reyes JC, Florencio FJ, Muro-Pastor MI.  
671 2007. The ammonium-inactivated cyanobacterial glutamine synthetase I is  
672 reactivated *in vivo* by a mechanism involving proteolytic removal of its inactivating  
673 factors. *Mol Microbiol* 65:166–179.
- 674 35. Klähn S, Bolay P, Wright PR, Atilho RM, Brewer KI, Hagemann M, Breaker RR,  
675 Hess WR. 2018. A glutamine riboswitch is a key element for the regulation of  
676 glutamine synthetase in cyanobacteria. *Nucleic Acids Res* 46:10082–10094.
- 677 36. Klähn S, Schaal C, Georg J, Baumgartner D, Knippen G, Hagemann M, Muro-  
678 Pastor AM, Hess WR. 2015. The sRNA NsiR4 is involved in nitrogen assimilation

- 679 control in cyanobacteria by targeting glutamine synthetase inactivating factor IF7.  
680 Proc Natl Acad Sci U S A 112:E6243-6252.
- 681 37. Görl M, Sauer J, Baier T, Forchhammer K. 1998. Nitrogen-starvation-induced  
682 chlorosis in *Synechococcus* PCC 7942: adaptation to long-term survival. Microbiol  
683 Read Engl 144 ( Pt 9):2449–2458.
- 684 38. Collier JL, Grossman AR. 1994. A small polypeptide triggers complete  
685 degradation of light-harvesting phycobiliproteins in nutrient-deprived  
686 cyanobacteria. EMBO J 13:1039–1047.
- 687 39. Llácer JL, Fita I, Rubio V. 2008. Arginine and nitrogen storage. Curr Opin Struct  
688 Biol 18:673–681.
- 689 40. Watzer B, Engelbrecht A, Hauf W, Stahl M, Maldener I, Forchhammer K. 2015.  
690 Metabolic pathway engineering using the central signal processor P<sub>II</sub>. Microb Cell  
691 Factories 14:192.
- 692 41. Watzer B, Spät P, Neumann N, Koch M, Sobotka R, Macek B, Henrich O,  
693 Forchhammer K. 2019. The signal transduction protein P<sub>II</sub> controls ammonium,  
694 nitrate and urea uptake in cyanobacteria. Front Microbiol 10:1428.
- 695 42. Muro-Pastor MI, Cutillas-Farray Á, Pérez-Rodríguez L, Pérez-Saavedra J, Armas  
696 AV, Paredes A, Robles-Rengel R, Florencio FJ. 2020. CfrA, a novel carbon flow  
697 regulator, adapts carbon metabolism to nitrogen deficiency in cyanobacteria.  
698 Plant Physiol <https://doi.org/10.1104/pp.20.00802>.
- 699 43. Orthwein T, Scholl J, Spät P, Lucius S, Koch M, Macek B, Hagemann M,  
700 Forchhammer K. 2020. The novel P<sub>II</sub>-interacting regulator PirC (SII0944) identifies

- 701 3-phosphoglycerate mutase (PGAM) as central control point of carbon storage  
702 metabolism in cyanobacteria. bioRxiv 2020.09.11.292599.
- 703 44. Forchhammer K. 2008. P(II) signal transducers: novel functional and structural  
704 insights. Trends Microbiol 16:65–72.
- 705 45. Fokina O, Chellamuthu V-R, Zeth K, Forchhammer K. 2010. A novel signal  
706 transduction protein P<sub>II</sub> variant from *Synechococcus elongatus* PCC 7942  
707 indicates a two-step process for NAGK–P<sub>II</sub> complex formation. J Mol Biol  
708 399:410–421.
- 709 46. Zeth K, Fokina O, Forchhammer K. 2012. An engineered P<sub>II</sub> protein variant that  
710 senses a novel ligand: atomic resolution structure of the complex with citrate. Acta  
711 Crystallogr D Biol Crystallogr 68:901–908.
- 712 47. Burillo S, Luque I, Fuentes I, Contreras A. 2004. Interactions between the nitrogen  
713 signal transduction protein P<sub>II</sub> and N-acetyl glutamate kinase in organisms that  
714 perform oxygenic photosynthesis. J Bacteriol 186:3346–3354.
- 715 48. Charlier D, Bervoets I. 2019. Regulation of arginine biosynthesis, catabolism and  
716 transport in *Escherichia coli*. Amino Acids 51:1103–1127.
- 717 49. Cunin R, Glansdorff N, Piérard A, Stalon V. 1986. Biosynthesis and metabolism  
718 of arginine in bacteria. Microbiol Rev 50:314–352.
- 719 50. Chellamuthu V-R, Ermilova E, Lapina T, Lüddecke J, Minaeva E, Herrmann C,  
720 Hartmann MD, Forchhammer K. 2014. A widespread glutamine-sensing  
721 mechanism in the plant kingdom. Cell 159:1188–1199.

- 722 51. Sugiyama K, Hayakawa T, Kudo T, Ito T, Yamaya T. 2004. Interaction of N-  
723 acetylglutamate kinase with a P<sub>II</sub>-like protein in rice. *Plant Cell Physiol* 45:1768–  
724 1778.
- 725 52. Li Y, Liu W, Sun L-P, Zhou Z-G. 2017. Evidence for P<sub>II</sub> with NAGK interaction that  
726 regulates Arg synthesis in the microalga *Myrmecia incisa* in response to nitrogen  
727 starvation. 1. *Sci Rep* 7:16291.
- 728 53. Selim KA, Ermilova E, Forchhammer K. 2020. From cyanobacteria to  
729 Archaeplastida: new evolutionary insights into P<sub>II</sub> signalling in the plant kingdom.  
730 *New Phytol* 227:722–731.
- 731 54. Leigh JA, Dodsworth JA. 2007. Nitrogen regulation in bacteria and archaea. *Annu*  
732 *Rev Microbiol* 61:349–377.
- 733 55. Muro-Pastor MI, Reyes JC, Florencio FJ. 2001. Cyanobacteria perceive nitrogen  
734 status by sensing intracellular 2-oxoglutarate levels. *J Biol Chem* 276:38320–  
735 38328.
- 736 56. Battchikova N, Vainonen JP, Vorontsova N, Keranen M, Carmel D, Aro E-M. 2010.  
737 Dynamic changes in the proteome of *Synechocystis* 6803 in response to CO<sub>2</sub>)  
738 limitation revealed by quantitative proteomics. *J Proteome Res* 9:5896–5912.
- 739 57. Orf I, Klähn S, Doreen Schwarz D, Frank M, Hess WR, Hagemann M, Kopka J.  
740 2015. Integrated analysis of engineered carbon limitation in a quadruple  
741 CO<sub>2</sub>/HCO<sub>3</sub><sup>-</sup>-uptake mutant of *Synechocystis* sp. PCC 6803. *Plant Physiol*  
742 pp.01289.2015.

- 743 58. Fokina O, Herrmann C, Forchhammer K. 2011. Signal-transduction protein P<sub>II</sub>  
744 from *Synechococcus elongatus* PCC 7942 senses low adenylate energy charge  
745 *in vitro*. *Biochem J* 440:147–156.
- 746 59. Zeth K, Fokina O, Forchhammer K. 2014. Structural basis and target-specific  
747 modulation of ADP sensing by the *Synechococcus elongatus* P<sub>II</sub> signaling protein.  
748 *J Biol Chem* 289:8960–8972.
- 749 60. Lüddecke J, Forchhammer K. 2013. From P<sub>II</sub> signaling to metabolite sensing: a  
750 novel 2-oxoglutarate sensor that details P<sub>II</sub> - NAGK complex formation. *PLoS ONE*  
751 8.
- 752 61. Sato S, Shimoda Y, Muraki A, Kohara M, Nakamura Y, Tabata S. 2007. A large-  
753 scale protein protein interaction analysis in *Synechocystis* sp. PCC6803. *DNA*  
754 *Res Int J Rapid Publ Rep Genes Genomes* 14:207–216.
- 755 62. Anfelt J, Hallström B, Nielsen J, Uhlén M, Hudson EP. 2013. Using transcriptomics  
756 to improve butanol tolerance of *Synechocystis* sp. strain PCC 6803. *Appl Environ*  
757 *Microbiol* 79:7419–7427.
- 758 63. Trinh CT, Huffer S, Clark ME, Blanch HW, Clark DS. 2010. Elucidating  
759 mechanisms of solvent toxicity in ethanologenic *Escherichia coli*. *Biotechnol*  
760 *Bioeng* 106:721–730.
- 761 64. Volkers RJM, de Jong AL, Hulst AG, van Baar BLM, de Bont JAM, Wery J. 2006.  
762 Chemostat-based proteomic analysis of toluene-affected *Pseudomonas putida*  
763 S12. *Environ Microbiol* 8:1674–1679.



- 764 65. Picossi S, Flores E, Herrero A. 2014. ChIP analysis unravels an exceptionally  
765 wide distribution of DNA binding sites for the NtcA transcription factor in a  
766 heterocyst-forming cyanobacterium. *BMC Genomics* 15:22.
- 767 66. Hanson TE, Forchhammer K, Tandeau de Marsac N, Meeks JC. 1998.  
768 Characterization of the *glnB* gene product of *Nostoc punctiforme* strain ATCC  
769 29133: *glnB* or the P<sub>II</sub> protein may be essential. *Microbiol Read Engl* 144 ( Pt  
770 6):1537–1547.
- 771 67. Palinska KA, Laloui W, Bédu S, Loiseaux-de Goer S, Castets AM, Rippka R,  
772 Tandeau de Marsac N. 2002. The signal transducer P<sub>II</sub> and bicarbonate  
773 acquisition in *Prochlorococcus marinus* PCC 9511, a marine cyanobacterium  
774 naturally deficient in nitrate and nitrite assimilation. *Microbiol Read Engl*  
775 148:2405–2412.
- 776 68. Flores E, Arévalo S, Burnat M. 2019. Cyanophycin and arginine metabolism in  
777 cyanobacteria. *Algal Res* 42:101577.
- 778 69. Steglich C, Futschik ME, Lindell D, Voss B, Chisholm SW, Hess WR. 2008. The  
779 challenge of regulation in a minimal photoautotroph: Non-coding RNAs in  
780 *Prochlorococcus*. *PLOS Genet* 4:e1000173.
- 781 70. Rippka R, Deruelles J, Waterbury JB, Herdman M, Stanier RY. 1979. Generic  
782 assignments, strain histories and properties of pure cultures of cyanobacteria.  
783 *Microbiology* 111:1–61.
- 784 71. García-Domínguez M, Lopez-Maury L, Florencio FJ, Reyes JC. 2000. A gene  
785 cluster involved in metal homeostasis in the cyanobacterium *Synechocystis* sp.  
786 strain PCC 6803. *J Bacteriol* 182:1507–1514.

- 787 72. Elhai J, Wolk CP. 1988. A versatile class of positive-selection vectors based on  
788 the nonviability of palindrome-containing plasmids that allows cloning into long  
789 polylinkers. *Gene* 68:119–138.
- 790 73. Pinto FL, Thapper A, Sontheim W, Lindblad P. 2009. Analysis of current and  
791 alternative phenol based RNA extraction methodologies for cyanobacteria. *BMC*  
792 *Mol Biol* 10:79.
- 793 74. Hein S, Scholz I, Voß B, Hess WR. 2013. Adaptation and modification of three  
794 CRISPR loci in two closely related cyanobacteria. *RNA Biol* 10:852–864.
- 795 75. Reyes JC, Crespo JL, Garcia-Dominguez M, Florencio FJ. 1995. Electron  
796 transport controls glutamine synthetase activity in the facultative heterotrophic  
797 cyanobacterium *Synechocystis* sp. PCC 6803. *Plant Physiol* 109:899–905.
- 798 76. Laemmli UK. 1970. Cleavage of structural proteins during the assembly of the  
799 head of Bacteriophage T4. 5259. *Nature* 227:680–685.
- 800 77. Navarro F, Martín-Figueroa E, Florencio FJ. 2000. Electron transport controls  
801 transcription of the thioredoxin gene *trxA* in the cyanobacterium *Synechocystis*  
802 sp. PCC 6803. *Plant Mol Biol* 43:23–32.
- 803 78. Reinholdt O, Schwab S, Zhang Y, Reichheld J-P, Fernie AR, Hagemann M, Timm  
804 S. 2019. Redox-regulation of photorespiration through mitochondrial Thioredoxin  
805 o1. *Plant Physiol* 181:442–457.
- 806 79. Scholl J, Dengler L, Bader L, Forchhammer K. 2020. Phosphoenolpyruvate  
807 carboxylase from the cyanobacterium *Synechocystis* sp. PCC 6803 is under  
808 global metabolic control by P<sub>II</sub> signaling. *Mol Microbiol* 114:292–307.

- 809 80. Harper S, Speicher DW. 2011. Purification of proteins fused to glutathione S-  
810 transferase, p. 259–280. *In* Walls, D, Loughran, ST (eds.), Protein  
811 Chromatography: Methods and Protocols. Humana Press, Totowa, NJ.
- 812 81. Maheswaran M, Urbanke C, Forchhammer K. 2004. Complex Formation and  
813 Catalytic Activation by the P<sub>II</sub> Signaling Protein of *N*-Acetyl-l-glutamate Kinase  
814 from *Synechococcus elongatus* Strain PCC 7942. *J Biol Chem* 279:55202–55210.
- 815 82. Kumar S, Stecher G, Tamura K. 2016. MEGA7: Molecular evolutionary genetics  
816 analysis version 7.0 for bigger datasets. *Mol Biol Evol* 33:1870–1874.
- 817 83. Altschul SF, Gish W, Miller W, Myers EW, Lipman DJ. 1990. Basic local alignment  
818 search tool. *J Mol Biol* 215:403–410.
- 819 84. Mitschke J, Georg J, Scholz I, Sharma CM, Dienst D, Bantscheff J, Voß B,  
820 Steglich C, Wilde A, Vogel J, Hess WR. 2011. An experimentally anchored map  
821 of transcriptional start sites in the model cyanobacterium *Synechocystis* sp.  
822 PCC6803. *Proc Natl Acad Sci* 108:2124–2129.
- 823 85. Krasikov V, Aguirre von Wobeser E, Dekker HL, Huisman J, Matthijs HCP. 2012.  
824 Time-series resolution of gradual nitrogen starvation and its impact on  
825 photosynthesis in the cyanobacterium *Synechocystis* PCC 6803. *Physiol Plant*  
826 145:426–439.
- 827 86. Schneider CA, Rasband WS, Eliceiri KW. 2012. NIH Image to ImageJ: 25 years  
828 of image analysis. *Nat Methods* 9:671–675.
- 829

## 830 Figures

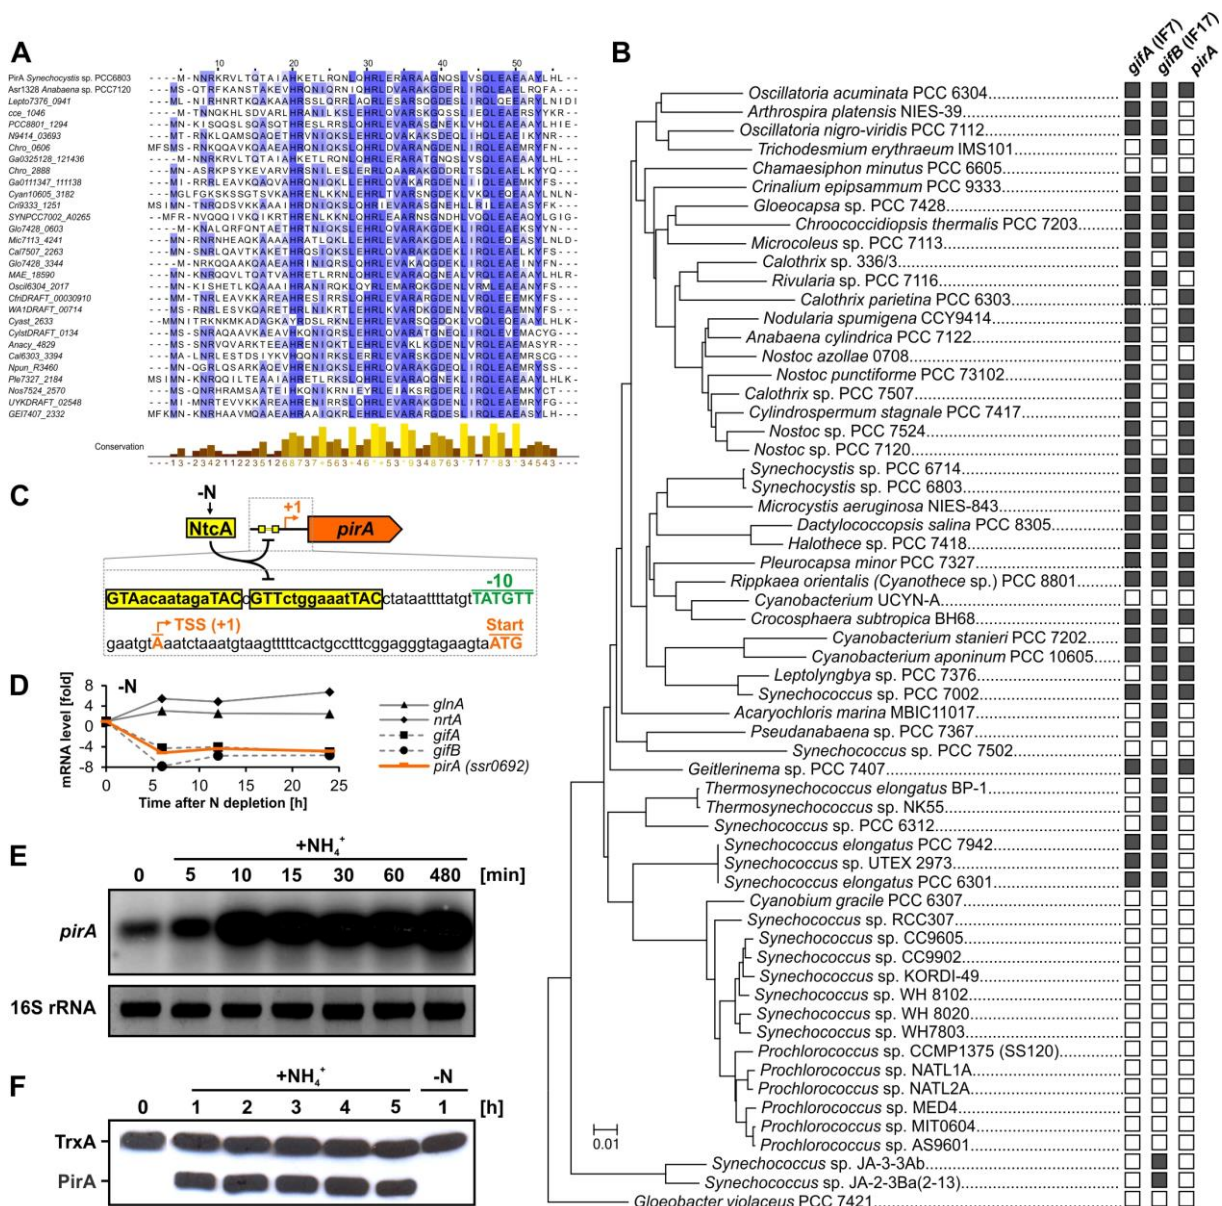

831

832 **Figure 1: The N-regulated gene *pirA* and its occurrence among cyanobacteria.** **A:** Amino acid alignment of  
 833 randomly selected cyanobacterial PirA homologs. The alignment was made using ClustalW and visualized by using  
 834 Jalview. **B:** Phylogenetic tree of selected cyanobacteria based on 16S rDNA sequences. The tree was generated  
 835 with the MEGA7 (82) software package and the Neighbor-Joining method. Please note that we re-used a calculated  
 836 tree from our previous publication (35) and assigned the presence of genes in the corresponding genomes  
 837 manually. Gene presence (illustrated by filled rectangle) was investigated using the BLASTP algorithm (83). As  
 838 reference the amino acid sequences of PirA, IF7 (GifA, Ssl1911) and IF17 (GifB, Sll1515) from *Synechocystis* were  
 839 used. **C:** Overview of the promoter region upstream of the *pirA* gene in *Synechocystis*. Two putative NtcA binding  
 840 sites are highlighted. The transcriptional start site (TSS, +1) and the location of the -10 element were extracted from  
 841 differential RNAseq data (84). **D:** Changes of mRNA levels for several *Synechocystis* genes in response to N  
 842 limitation. Data were extracted and plotted from previously published microarray data (85). **E:** Northern blot showing  
 843 transcript accumulation of *pirA* in nitrate-grown *Synechocystis* cells upon addition of 10 mM ammonium chloride.  
 844 16S rRNA was used as loading control **F:** Western blot showing changes in PirA protein levels in response to  
 845 ammonium upshifts and subsequent N depletion. For this a specific, customized antibody against PirA has been  
 846 raised in rabbit. An antibody against thioredoxin (TrxA) was used to verify equal loading.

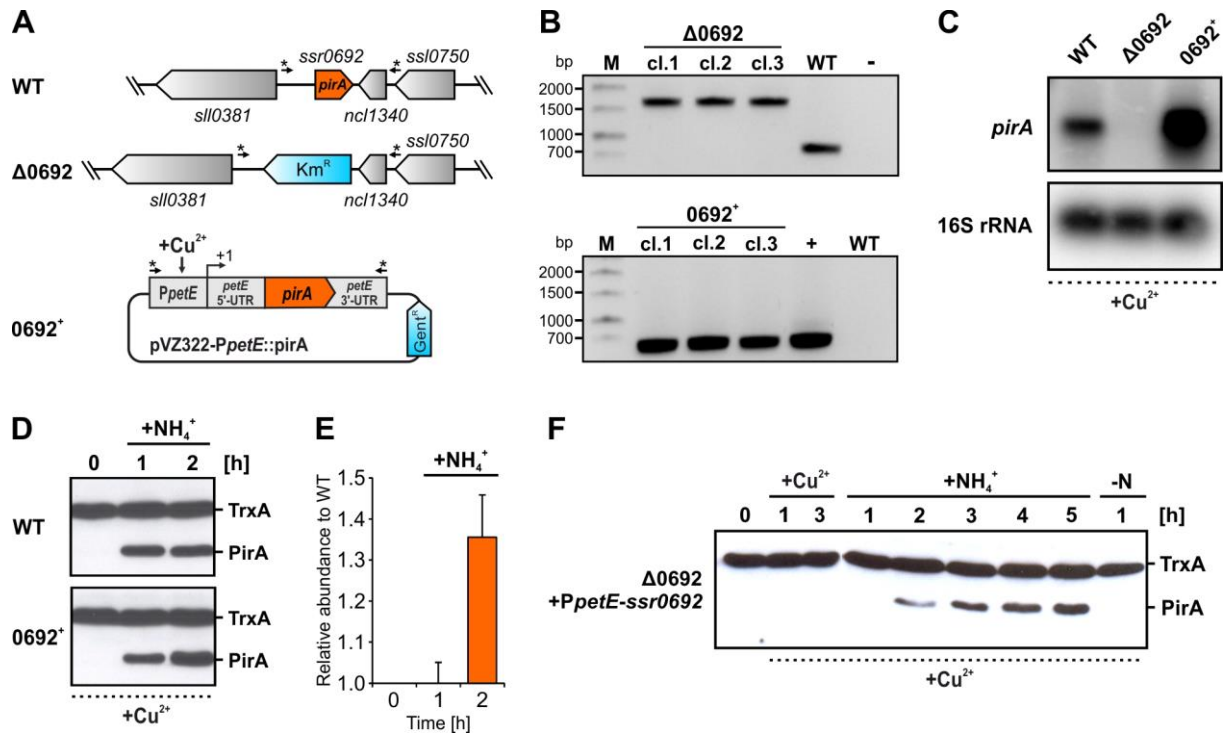

847

848 **Figure 2: Properties and expression profiles in recombinant strains  $\Delta 0692$  and  $0692^+$ .** **A:** Schematic view of  
 849 the *pirA* locus in the WT and in the knockout strain  $\Delta 0692$  as well as of a pVZ322 plasmid derivative harboring a  
 850 *pirA* gene copy under control of the Cu<sup>2+</sup>-inducible promoter *PpetE* that is present in the overexpression strain  
 851  $0692^+$ . In the  $\Delta 0692$  knockout strain, *pirA* was replaced by a kanamycin resistance cassette (*Km<sup>R</sup>*) via homologous  
 852 recombination. The plasmid enabling ectopic *pirA* expression was introduced into *Synechocystis* WT. The arrows  
 853 labelled with asterisks indicate the binding sites for primers used to verify the mutants. **B:** PCR verification of the  
 854 genotype of independently obtained mutant strains. In each case three clones were tested using primer  
 855 combinations *Ssr0692\_KO-seg\_fw/Ssr0692\_KO-seg\_rev* (in case of  $\Delta 0692$ ) or *PpetE\_fw(XhoI)* and  
 856 *Toop\_rev(Asel)* (in case of  $0692^+$ ). M, marker; bp, base pairs; cl., clone; -, negative control (water as template); +,  
 857 positive control (purified plasmid as template). **C:** Relative abundance of the *pirA* mRNA, measured via northern  
 858 blot using sequence specific <sup>32</sup>P-labelled ssRNA probes. In all cases RNA was isolated from cells grown in presence  
 859 of 1  $\mu$ M CuSO<sub>4</sub>. **D:** Western blot showing PirA protein levels in cells of the WT and strain  $0692^+$ , treated with 1  $\mu$ M  
 860 Cu<sup>2+</sup> for 3 hours and afterwards with 10 mM ammonium. Thioredoxin (TrxA) levels verify equal loading. **E:** PirA  
 861 levels relative to WT. Data were obtained by densitometric evaluation of respective bands using the ImageJ  
 862 software (86). Data are the mean  $\pm$  SD of values obtained from two independent western blots, i.e. two biological  
 863 replicates (independent clones). **F:** PirA accumulation in a  $\Delta 0692$  strain that was complemented with a *pirA* gene  
 864 fused to the *petE* promoter. Please note that the data shown here were obtained using a mutant in which the *PpetE-*  
 865 *pirA* construct was integrated into the chromosome, i.e. this strain does not harbor the plasmid derivative shown in  
 866 panel A.

867

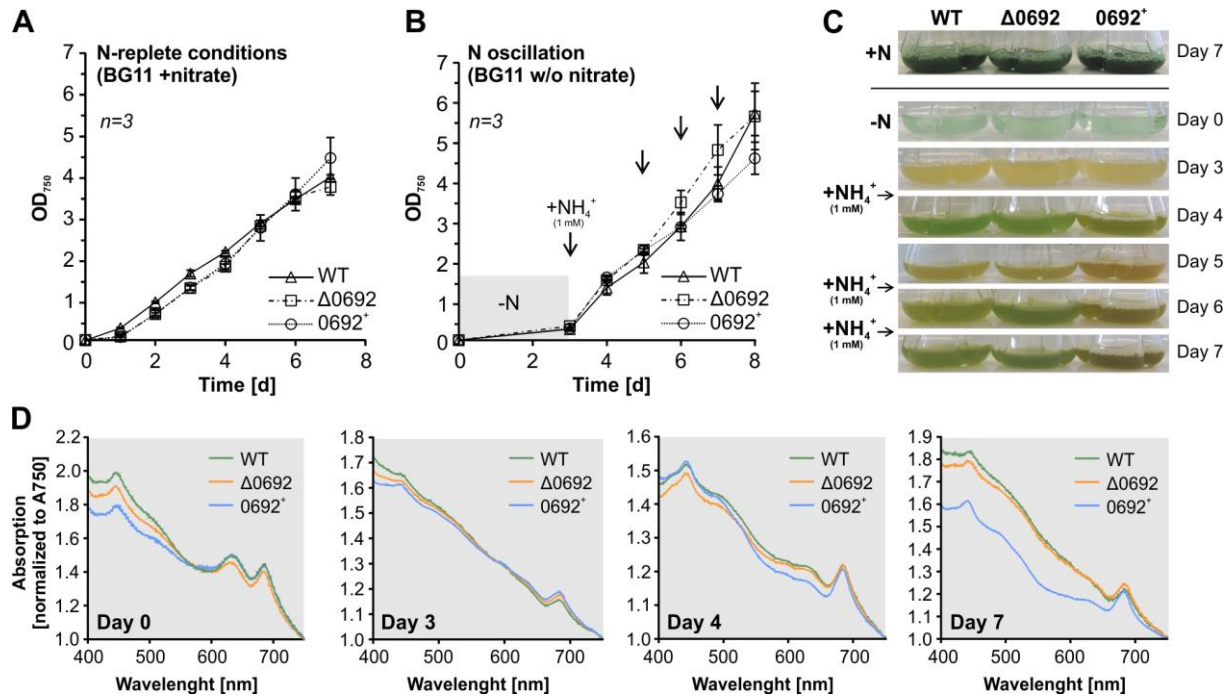

868

869 **Figure 3: Growth and pigmentation of the WT and the mutant strains  $\Delta 0692$  and  $0692^+$  when N is oscillating.**  
870 **A, B:** Growth under standard conditions and when ammonium is consecutively added to N starved cultures. Arrows  
871 indicate time points at which 1 mM  $NH_4Cl$  was added. Data are the mean  $\pm$  SD of three independent cultures  
872 (including three independent clones of each mutant). **C:** Representative photographs of cultures used in the  
873 experiment. Ammonium was added after day 3 and repeated after days 5 and 6. **D:** Whole cell absorption spectra.  
874 Values were normalized to  $A_{750}$  values.

875

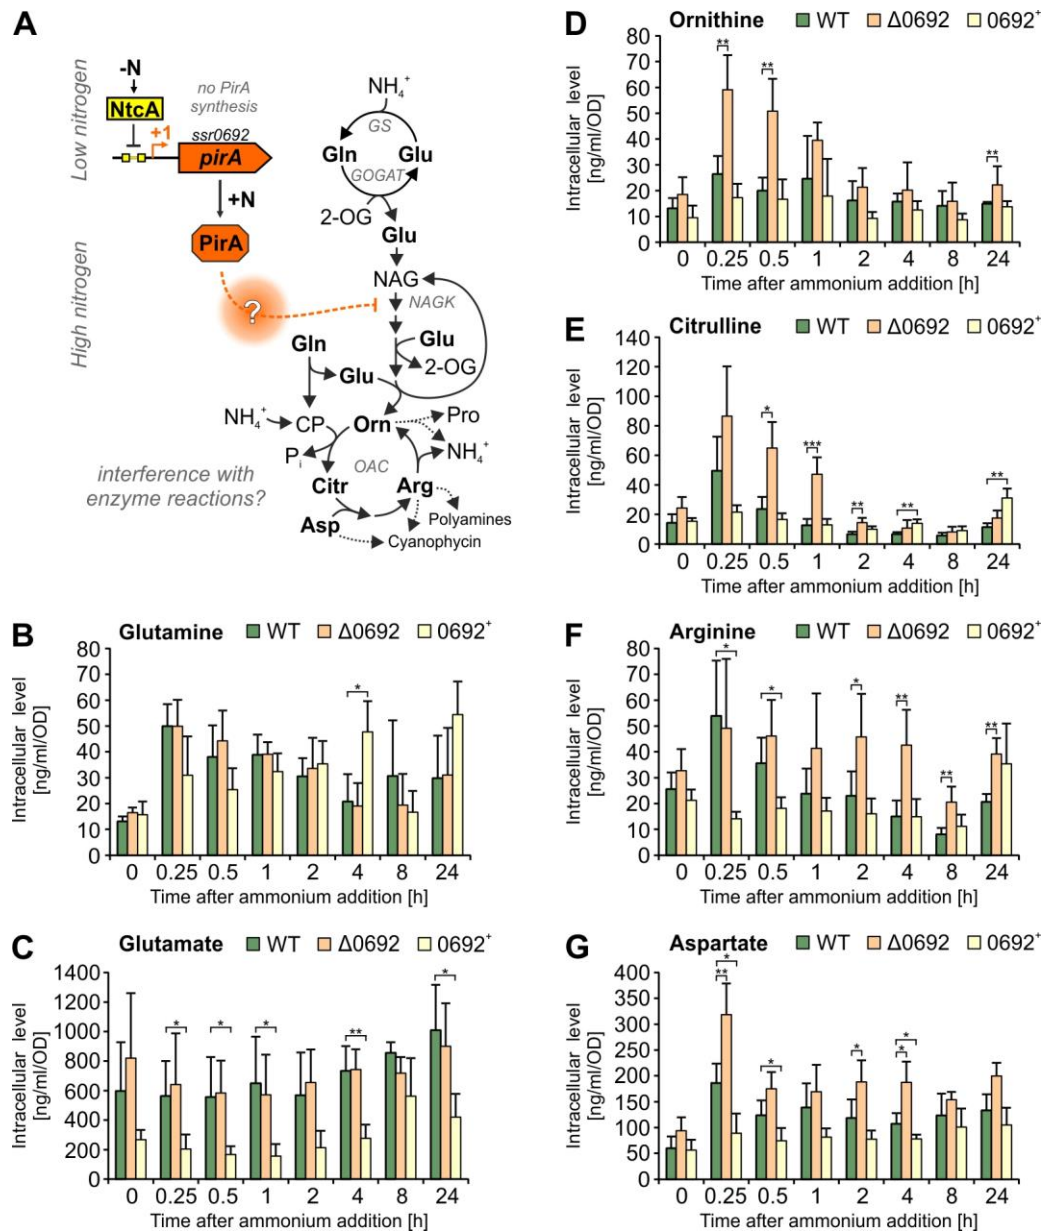

876

877 **Figure 4: Kinetics of metabolites linked to the OAC cycle in response to ammonium addition.** **A:** Simplified  
 878 overview of metabolic pathways associated with ammonium assimilation and a possible regulatory impact of PirA  
 879 on certain enzymatic reactions. 2-OG - 2-oxoglutarate, CP - carbamoyl phosphate, GS - glutamine synthetase,  
 880 GOGAT - glutamine oxoglutarate aminotransferase, NAG - N-acetyl-glutamate, NAGK - N-acetyl glutamate kinase,  
 881 OAC - ornithine-ammonia cycle. **B-G:** Kinetics of selected metabolites after adding 10 mM ammonium to nitrate-  
 882 grown cells in the exponential phase. Metabolites were determined by UHPLC-MS/MS after ethanol extraction from  
 883 cells of the WT,  $\Delta 0692$  and 0692<sup>+</sup>. Data are the mean  $\pm$  SD of two independent experiments, each conducted with  
 884 three biological replicates (independent clones). Significant differences between the strains are labeled and were  
 885 revealed by one-way analysis of variance (ANOVA; \*  $p < 0.05$ , \*\*  $p < 0.01$ , \*\*\*  $p < 0.001$ ).

886

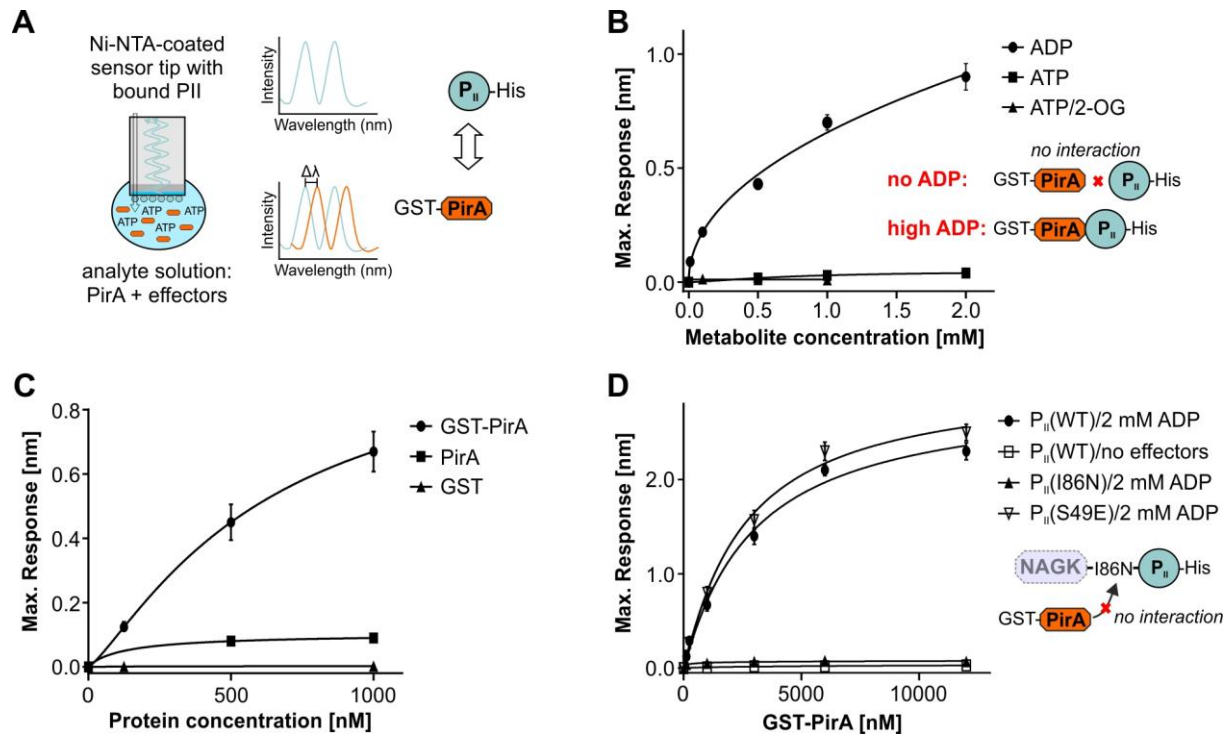

887

888 **Figure 5: Determination of complex formation between PirA and the P<sub>II</sub> protein measured by Bio-layer**  
 889 **interferometry (BLI).** **A:** Schematic view of the measuring principle. **B:** Representation of the maximum binding  
 890 response of P<sub>II</sub>(WT)-His and GST-PirA interaction in the presence of different concentrations of ADP, ATP or ATP/2-  
 891 OG. **C:** The maximum binding response at different protein concentrations of GST-PirA, tag-free PirA or free GST  
 892 in the presence of 2 mM ADP. As the binding response is a function of the mass of bound interactor, the response  
 893 with GST-tagged PirA is correspondingly higher than with isolated PirA peptide. **D:** Representation of the maximum  
 894 binding response at increasing concentrations of GST-PirA in the absence of effector molecules or in the presence  
 895 of 2 mM ADP with three different T-loop variants of P<sub>II</sub>. Data are the mean  $\pm$  SD of triplicate measurements.

896

897



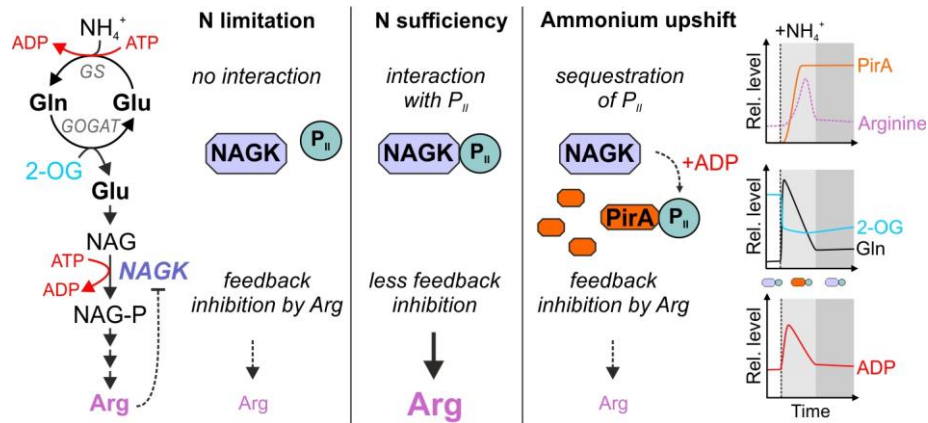

898

899 **Figure 6: Anticipated model of PirA function.** Metabolite kinetics have been approximated based on available  
 900 literature data (32, 35). Upon shifts in the ammonium concentration PirA accumulates via 2-OG dependent de-  
 901 repression of the *pirA* gene. The gene product is presumably required to slow down ATP-consuming synthesis of  
 902 arginine. This could be achieved by ADP-dependent sequestration of P<sub>II</sub> protein bound to NAGK which is required  
 903 to diminish feedback inhibition of the enzyme and in turn activate arginine synthesis. The sequestration of P<sub>II</sub> results  
 904 in stronger arginine feedback inhibition of NAGK diminishing energy consumption and flux into arginine. After  
 905 metabolic reorganization (e.g. by inactivating glutamine synthetase activity and decreasing ATP consumption), ADP  
 906 levels may fall below a critical level preventing interaction between PirA and P<sub>II</sub>. Accordingly, a higher fraction of  
 907 the P<sub>II</sub> pool will again interact with and activate NAGK, which in turn results in elevated arginine synthesis.

908

909

910 **Appendix**

911

912 **Supplementary Table S1: Primers used in this study.**

| Designation         | 5'-3' sequence                               | Used for                                                                |
|---------------------|----------------------------------------------|-------------------------------------------------------------------------|
| 5'petE-ssr0692_rev  | gattattcactctctggcgattgtatct                 | Amplification of <i>petE</i> 5'UTR                                      |
| PpetE_fw(XhoI)      | actcgaggaagggatagcaagc                       | Amplification of <i>petE</i> 5'UTR                                      |
| 3'petE-ssr0692_fw   | cacctgtaatcagccagctcaatct                    | Amplification of <i>petE</i> 3'UTR                                      |
| Toop_rev(Asel)      | gattaataataaaaaacgcccggcg                    | Amplification of <i>petE</i> 3'UTR                                      |
| ssr0692_fw          | ccaagaagtatgaataatcgtaaactgttttga            | Amplification of <i>ssr0692</i>                                         |
| ssr0692_rev         | gctggctgattacaggtggagataagca                 | Amplification of <i>ssr0692</i>                                         |
| Ssr0692-Probe_T7_fw | taatacgactcactatagggctaaggactgattgccg<br>gcg | Probe template generation for northern blot specific for <i>ssr0692</i> |
| Ssr0692-Probe_rev   | gaataatcgtaaactgttttgactcaaac                | Probe template generation for northern blot specific for <i>ssr0692</i> |
| Ssr0692upst_fw      | tcagcaagatagagttccactcggt                    | Amplification of <i>ssr0692</i> upstream region                         |
| Ssr0692upst_rev     | cggccgctttccacaagaataagctcaa                 | Amplification of <i>ssr0692</i> upstream region                         |
| KmR_fw              | ttgtgaaacgcgccgcag                           | Amplification of Kanamycin resistance cassette                          |
| KmR_rev             | acaatagataataaaaaacgcccggc                   | Amplification of Kanamycin resistance cassette                          |
| Ssr0692dwnst_fw     | gtttttatttatctattgttactgaagtaacaaaaatgt      | Amplification of <i>ssr0692</i> downstream region                       |
| Ssr0692dwnst_rev    | ctagaaagattctgggggaagg                       | Amplification of <i>ssr0692</i> downstream region                       |
| Ssr0692_KO-seg_fw   | tcagaccgaagtggaaact                          | Segregation primer for <i>ssr0692</i> knockout verification             |
| Ssr0692_KO-seg_rev  | gtactttcaagcgcca                             | Segregation primer for <i>ssr0692</i> knockout verification             |
| 5sRNA_for           | taatacgactcactataggagaagaggaactggc<br>atcgac | Probe template generation for northern blot specific for 5s rRNA        |
| 5sRNA_rev           | gtcatggaaccactccgatccc                       | Probe template generation for northern blot specific for 5s rRNA        |
| Ssr0692ORF-fw       | gctactaatgaataatcgtaaactgtg                  | Amplification of <i>ssr0692</i>                                         |

|                          |                                                     |                                 |
|--------------------------|-----------------------------------------------------|---------------------------------|
| Ssr0692ORF-rv            | gctactcgaggtggagataagcagcttc                        | Amplification of <i>ssr0692</i> |
| <i>ssr0692</i> .KpnI     | gctggtaccatgaataatcgtaaacttg                        | Amplification of <i>ssr0692</i> |
| <i>ssr0692</i> .HisBamHI | gctggatccttagtggtggtggtggtgagcaggtgga<br>gataagcagc | Amplification of <i>ssr0692</i> |
| <i>PpetE</i> .KpnI.1     | gctggtaccctcaggagcgacttcagc                         | Amplification of <i>PpetE</i>   |
| <i>PpetE</i> .KpnI.2.    | gctggtaccacttctggcgattgtatc                         | Amplification of <i>PpetE</i>   |

913

914

915

916 **Supplementary Table S2: Strains used in this study.**

| Strain name                              | Source                    | Parental strain                             | Features                                                                                                                                                       |
|------------------------------------------|---------------------------|---------------------------------------------|----------------------------------------------------------------------------------------------------------------------------------------------------------------|
| WT                                       | Norio<br>Murata<br>(Jap.) | -                                           | <i>Synechocystis</i> sp. PCC 6803, wild type, glucose-tolerant, non-motile                                                                                     |
| $\Delta$ 0692                            | This study                | <i>Synechocystis</i> sp. PCC 6803 wild type | recombinant <i>Synechocystis</i> strain in which the <i>pirA</i> gene was deleted and replaced by a kanamycin resistance cassette                              |
| 0692 <sup>+</sup>                        | This study                | <i>Synechocystis</i> sp. PCC 6803 wild type | recombinant <i>Synechocystis</i> strain carrying the pVZ322-PpetE: <i>ssr0692</i> plasmid used for ectopic, Cu <sup>2+</sup> -inducible <i>pirA</i> expression |
| $\Delta$ 0692 + PpetE-<br><i>ssr0692</i> | This study                | $\Delta$ 0692                               | knockout strain for <i>pirA</i> with a PpetE:: <i>ssr0692</i> construct inserted into the chromosome                                                           |

917

918
